# Supplementary material for: Trehalose Biosynthesis Promotes Pseudomonas aeruginosa Pathogenicity in Plants
Source: PubMed Central journal article supplement (PMC3591346; doi:10.1371/journal.ppat.1003217), 2013-03-07
Supplement: ppat.1003217.s012.pdf [file ppat.1003217.s012.pdf]

**Supplementary Table 2. Predicted functions and orthologs of PA14\_36375-36830 genes across sequenced *Pseudomonas* genomes\***

| PA14 loci  | Predicted Function                                    | <i>Pseudomonas aeruginosa</i> 2192 | <i>Pseudomonas aeruginosa</i> C3719 | <i>Pseudomonas aeruginosa</i> PA7 | <i>Pseudomonas aeruginosa</i> PAO1 | <i>Pseudomonas aeruginosa</i> UCBPP-PA14 | <i>Pseudomonas entomophila</i> L48 | <i>Pseudomonas fluorescens</i> Pf-5 | <i>Pseudomonas fluorescens</i> Pf0-1 | <i>Pseudomonas mendocina</i> ymp | <i>Pseudomonas putida</i> F1 | <i>Pseudomonas putida</i> GB-1 | <i>Pseudomonas putida</i> KT2440 | <i>Pseudomonas putida</i> W619 | <i>Pseudomonas stutzeri</i> A1501 | <i>Pseudomonas syringae</i> pv. <i>phaseolicola</i> 1448A | <i>Pseudomonas syringae</i> pv. <i>syringae</i> B728a | <i>Pseudomonas syringae</i> pv. <i>tomato</i> str. DC3000 |
|------------|-------------------------------------------------------|------------------------------------|-------------------------------------|-----------------------------------|------------------------------------|------------------------------------------|------------------------------------|-------------------------------------|--------------------------------------|----------------------------------|------------------------------|--------------------------------|----------------------------------|--------------------------------|-----------------------------------|-----------------------------------------------------------|-------------------------------------------------------|-----------------------------------------------------------|
| PA14_36375 | ABC transporter, ATPase component                     | ✓                                  | ✓                                   | ✓                                 | ✓                                  | ✓                                        | ✓                                  | ✓                                   | ✓                                    | ✓                                | ✓                            | ✓                              | ✓                                | ✓                              | ✓                                 | ✓                                                         | ✓                                                     | ✓                                                         |
| PA14_36390 | methyltransferase                                     | ✓                                  | ✓                                   | ✓                                 | ✓                                  | ✓                                        | ✓                                  | ✓                                   | ✓                                    | ✓                                | ✓                            | ✓                              | ✓                                | ✓                              | ✓                                 | ✓                                                         | ✓                                                     | ✓                                                         |
| PA14_36400 | hypothetical protein                                  | ✓                                  | ✓                                   | ✓                                 | ✓                                  | ✓                                        | ✓                                  | ✓                                   | ✓                                    | ✓                                | ✓                            | ✓                              | ✓                                | ✓                              | ✓                                 | ✓                                                         | ✓                                                     | ✓                                                         |
| PA14_36410 | conserved hypothetical protein                        | ✓                                  | ✓                                   | ✓                                 | ✓                                  | ✓                                        | ✓                                  | ✓                                   | ✓                                    | ✓                                | ✓                            | ✓                              | ✓                                | ✓                              | ✓                                 | ✓                                                         | ✓                                                     | ✓                                                         |
| PA14_36420 | PAS/PAC sensor hybrid histidine kinase                | ✓                                  | ✓                                   | ✓                                 | ✓                                  | ✓                                        | ✓                                  | ✓                                   | ✓                                    | ✓                                | ✓                            | ✓                              | ✓                                | ✓                              | ✓                                 | ✓                                                         | ✓                                                     | ✓                                                         |
| PA14_36450 | conserved hypothetical protein                        | ✓                                  | ✓                                   | ✓                                 | ✓                                  | ✓                                        | ✓                                  | ✓                                   | ✓                                    | ✓                                | ✓                            | ✓                              | ✓                                | ✓                              | ✓                                 | ✓                                                         | ✓                                                     | ✓                                                         |
| PA14_36460 | hypothetical protein                                  | ✓                                  | ✓                                   | ✓                                 | ✓                                  | ✓                                        | ✓                                  | ✓                                   | ✓                                    | ✓                                | ✓                            | ✓                              | ✓                                | ✓                              | ✓                                 | ✓                                                         | ✓                                                     | ✓                                                         |
| PA14_36470 | hypothetical protein                                  | ✓                                  | ✓                                   | ✓                                 | ✓                                  | ✓                                        | ✓                                  | ✓                                   | ✓                                    | ✓                                | ✓                            | ✓                              | ✓                                | ✓                              | ✓                                 | ✓                                                         | ✓                                                     | ✓                                                         |
| PA14_36480 | hypothetical protein                                  | ✓                                  | ✓                                   | ✓                                 | ✓                                  | ✓                                        | ✓                                  | ✓                                   | ✓                                    | ✓                                | ✓                            | ✓                              | ✓                                | ✓                              | ✓                                 | ✓                                                         | ✓                                                     | ✓                                                         |
| PA14_36490 | hypothetical protein                                  | ✓                                  | ✓                                   | ✓                                 | ✓                                  | ✓                                        | ✓                                  | ✓                                   | ✓                                    | ✓                                | ✓                            | ✓                              | ✓                                | ✓                              | ✓                                 | ✓                                                         | ✓                                                     | ✓                                                         |
| PA14_36500 | putative cellulase/peptidase                          | ✓                                  | ✓                                   | ✓                                 | ✓                                  | ✓                                        | ✓                                  | ✓                                   | ✓                                    | ✓                                | ✓                            | ✓                              | ✓                                | ✓                              | ✓                                 | ✓                                                         | ✓                                                     | ✓                                                         |
| PA14_36520 | HHE hemerythrin cation binding protein                | ✓                                  | ✓                                   | ✓                                 | ✓                                  | ✓                                        | ✓                                  | ✓                                   | ✓                                    | ✓                                | ✓                            | ✓                              | ✓                                | ✓                              | ✓                                 | ✓                                                         | ✓                                                     | ✓                                                         |
| PA14_36530 | conserved hypothetical protein                        | ✓                                  | ✓                                   | ✓                                 | ✓                                  | ✓                                        | ✓                                  | ✓                                   | ✓                                    | ✓                                | ✓                            | ✓                              | ✓                                | ✓                              | ✓                                 | ✓                                                         | ✓                                                     | ✓                                                         |
| PA14_36540 | peptidase/esterase                                    | ✓                                  | ✓                                   | ✓                                 | ✓                                  | ✓                                        | ✓                                  | ✓                                   | ✓                                    | ✓                                | ✓                            | ✓                              | ✓                                | ✓                              | ✓                                 | ✓                                                         | ✓                                                     | ✓                                                         |
| PA14_36550 | conserved hypothetical protein                        | ✓                                  | ✓                                   | ✓                                 | ✓                                  | ✓                                        | ✓                                  | ✓                                   | ✓                                    | ✓                                | ✓                            | ✓                              | ✓                                | ✓                              | ✓                                 | ✓                                                         | ✓                                                     | ✓                                                         |
| PA14_36560 | hypothetical protein                                  | ✓                                  | ✓                                   | ✓                                 | ✓                                  | ✓                                        | ✓                                  | ✓                                   | ✓                                    | ✓                                | ✓                            | ✓                              | ✓                                | ✓                              | ✓                                 | ✓                                                         | ✓                                                     | ✓                                                         |
| PA14_36570 | GlgA, glycogen synthase                               | ✓                                  | ✓                                   | ✓                                 | ✓                                  | ✓                                        | ✓                                  | ✓                                   | ✓                                    | ✓                                | ✓                            | ✓                              | ✓                                | ✓                              | ✓                                 | ✓                                                         | ✓                                                     | ✓                                                         |
| PA14_36580 | TreZ, maltotrioligosyltrehalose trehalohydrolase      | ✓                                  | ✓                                   | ✓                                 | ✓                                  | ✓                                        | ✓                                  | ✓                                   | ✓                                    | ✓                                | ✓                            | ✓                              | ✓                                | ✓                              | ✓                                 | ✓                                                         | ✓                                                     | ✓                                                         |
| PA14_36590 | MalQ, 4-alpha-glucanotransferase                      | ✓                                  | ✓                                   | ✓                                 | ✓                                  | ✓                                        | ✓                                  | ✓                                   | ✓                                    | ✓                                | ✓                            | ✓                              | ✓                                | ✓                              | ✓                                 | ✓                                                         | ✓                                                     | ✓                                                         |
| PA14_36605 | TreY, trehalose biomaltotrioligosyltrehalose synthase | ✓                                  | ✓                                   | ✓                                 | ✓                                  | ✓                                        | ✓                                  | ✓                                   | ✓                                    | ✓                                | ✓                            | ✓                              | ✓                                | ✓                              | ✓                                 | ✓                                                         | ✓                                                     | ✓                                                         |
| PA14_36620 | conserved hypothetical protein                        | ✓                                  | ✓                                   | ✓                                 | ✓                                  | ✓                                        | ✓                                  | ✓                                   | ✓                                    | ✓                                | ✓                            | ✓                              | ✓                                | ✓                              | ✓                                 | ✓                                                         | ✓                                                     | ✓                                                         |
| PA14_36630 | glgX, glycogen debranching enzyme                     | ✓                                  | ✓                                   | ✓                                 | ✓                                  | ✓                                        | ✓                                  | ✓                                   | ✓                                    | ✓                                | ✓                            | ✓                              | ✓                                | ✓                              | ✓                                 | ✓                                                         | ✓                                                     | ✓                                                         |
| PA14_36650 | CBS domain-containing protein                         | ✓                                  | ✓                                   | ✓                                 | ✓                                  | ✓                                        | ✓                                  | ✓                                   | ✓                                    | ✓                                | ✓                            | ✓                              | ✓                                | ✓                              | ✓                                 | ✓                                                         | ✓                                                     | ✓                                                         |
| PA14_36660 | threonine dehydrogenase family                        | ✓                                  | ✓                                   | ✓                                 | ✓                                  | ✓                                        | ✓                                  | ✓                                   | ✓                                    | ✓                                | ✓                            | ✓                              | ✓                                | ✓                              | ✓                                 | ✓                                                         | ✓                                                     | ✓                                                         |
| PA14_36670 | protein of unknown function DUFF2                     | ✓                                  | ✓                                   | ✓                                 | ✓                                  | ✓                                        | ✓                                  | ✓                                   | ✓                                    | ✓                                | ✓                            | ✓                              | ✓                                | ✓                              | ✓                                 | ✓                                                         | ✓                                                     | ✓                                                         |
| PA14_36680 | putative metal-dependent hydrolase                    | ✓                                  | ✓                                   | ✓                                 | ✓                                  | ✓                                        | ✓                                  | ✓                                   | ✓                                    | ✓                                | ✓                            | ✓                              | ✓                                | ✓                              | ✓                                 | ✓                                                         | ✓                                                     | ✓                                                         |
| PA14_36690 | cardiolipin synthase 2                                | ✓                                  | ✓                                   | ✓                                 | ✓                                  | ✓                                        | ✓                                  | ✓                                   | ✓                                    | ✓                                | ✓                            | ✓                              | ✓                                | ✓                              | ✓                                 | ✓                                                         | ✓                                                     | ✓                                                         |
| PA14_36700 | transmembrane protein                                 | ✓                                  | ✓                                   | ✓                                 | ✓                                  | ✓                                        | ✓                                  | ✓                                   | ✓                                    | ✓                                | ✓                            | ✓                              | ✓                                | ✓                              | ✓                                 | ✓                                                         | ✓                                                     | ✓                                                         |
| PA14_36710 | GlgB, 1,4-alpha-glucan branching enzyme               | ✓                                  | ✓                                   | ✓                                 | ✓                                  | ✓                                        | ✓                                  | ✓                                   | ✓                                    | ✓                                | ✓                            | ✓                              | ✓                                | ✓                              | ✓                                 | ✓                                                         | ✓                                                     | ✓                                                         |
| PA14_36730 | putative trehalose synthase                           | ✓                                  | ✓                                   | ✓                                 | ✓                                  | ✓                                        | ✓                                  | ✓                                   | ✓                                    | ✓                                | ✓                            | ✓                              | ✓                                | ✓                              | ✓                                 | ✓                                                         | ✓                                                     | ✓                                                         |
| PA14_36740 | putative alpha-amylase family protein                 | ✓                                  | ✓                                   | ✓                                 | ✓                                  | ✓                                        | ✓                                  | ✓                                   | ✓                                    | ✓                                | ✓                            | ✓                              | ✓                                | ✓                              | ✓                                 | ✓                                                         | ✓                                                     | ✓                                                         |
| PA14_36760 | putative KU domain protein                            | ✓                                  | ✓                                   | ✓                                 | ✓                                  | ✓                                        | ✓                                  | ✓                                   | ✓                                    | ✓                                | ✓                            | ✓                              | ✓                                | ✓                              | ✓                                 | ✓                                                         | ✓                                                     | ✓                                                         |
| PA14_36770 | hypothetical protein                                  | ✓                                  | ✓                                   | ✓                                 | ✓                                  | ✓                                        | ✓                                  | ✓                                   | ✓                                    | ✓                                | ✓                            | ✓                              | ✓                                | ✓                              | ✓                                 | ✓                                                         | ✓                                                     | ✓                                                         |
| PA14_36780 | putative Mg(2+) transporter                           | ✓                                  | ✓                                   | ✓                                 | ✓                                  | ✓                                        | ✓                                  | ✓                                   | ✓                                    | ✓                                | ✓                            | ✓                              | ✓                                | ✓                              | ✓                                 | ✓                                                         | ✓                                                     | ✓                                                         |
| PA14_36790 | hypothetical protein                                  | ✓                                  | ✓                                   | ✓                                 | ✓                                  | ✓                                        | ✓                                  | ✓                                   | ✓                                    | ✓                                | ✓                            | ✓                              | ✓                                | ✓                              | ✓                                 | ✓                                                         | ✓                                                     | ✓                                                         |
| PA14_36810 | KatE, catalase HPII                                   | ✓                                  | ✓                                   | ✓                                 | ✓                                  | ✓                                        | ✓                                  | ✓                                   | ✓                                    | ✓                                | ✓                            | ✓                              | ✓                                | ✓                              | ✓                                 | ✓                                                         | ✓                                                     | ✓                                                         |
| PA14_36820 | conserved hypothetical protein                        | ✓                                  | ✓                                   | ✓                                 | ✓                                  | ✓                                        | ✓                                  | ✓                                   | ✓                                    | ✓                                | ✓                            | ✓                              | ✓                                | ✓                              | ✓                                 | ✓                                                         | ✓                                                     | ✓                                                         |
| PA14_36830 | hypothetical protein                                  | ✓                                  | ✓                                   | ✓                                 | ✓                                  | ✓                                        | ✓                                  | ✓                                   | ✓                                    | ✓                                | ✓                            | ✓                              | ✓                                | ✓                              | ✓                                 | ✓                                                         | ✓                                                     | ✓                                                         |

\*Putative functions of PA14\_36375-36830 genes were assigned as described in Methods. Genes of the reference taxon PA14 are indicated in the left column (PA14 loci), and different pseudomonad genomes are indicated on the top row. The presence of an ortholog is indicated by a checkmark. Boxes of identical hue indicate that the genes are contiguous in a particular genome, with the lighter shades on the top strand, and darker shades on the bottom strand. Checks in white boxes indicate an ortholog that is not contiguous with other PA14\_36375-36830 block orthologs.
